# Supplementary material for: Li+ transference number and dynamic ion correlations in glyme-Li salt solvate ionic liquids diluted with molecular solvents
Source: Royal Society of Chemistry journal article supplement (doi:10.1039/d2cp01409b), 2022-01-01
Supplement: d2cp01409b1.pdf [file d2cp01409b1.pdf]

## Supplementary Information

### Li<sup>+</sup> Transference Number and Dynamic Ion Correlations in Glyme-Li Salt Solvate Ionic Liquids Diluted with Molecular Solvents

*Taku Sudoh,<sup>a</sup> Keisuke Shigenobu,<sup>a</sup> Kaoru Dokko,<sup>a,b</sup> Masayoshi Watanabe,<sup>b</sup> and Kazuhide Ueno,<sup>a,b,\*</sup>*

<sup>a</sup>Department of Chemistry and Life Science, Yokohama National University, 79-5 Tokiwadai,  
Hodogaya-ku, Yokohama 240-8501, Japan

<sup>b</sup>Advanced Chemical Energy Research Centre (ACERC), Institute of Advanced Sciences,  
Yokohama National University, 79-5 Tokiwadai, Hodogaya-ku, Yokohama 240-8501, Japan

CORRESPONDING AUTHOR FOOTNOTE: To whom correspondence should be addressed.

Telephone/Fax: +81-45-339-3951. E-mail: ueno-kazuhide-rc@ynu.ac.jp

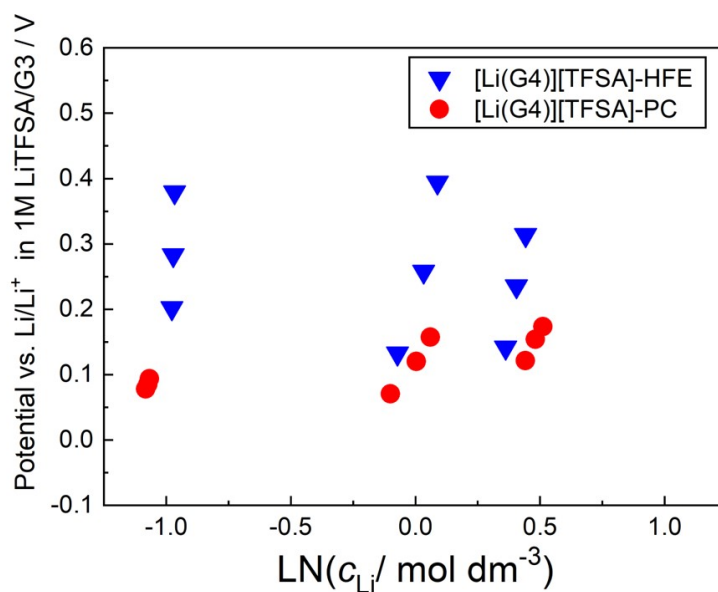

**Figure S1.** Plots of the Li/Li<sup>+</sup> electrode potential against the natural logarithm of the Li salt concentration in the [Li(G4)][TFSA] mixture with diluents (HFE or PC) at 30 °C. The reference electrode was Li/Li<sup>+</sup> in 1 mol dm<sup>-3</sup> LiTFSA/G3.

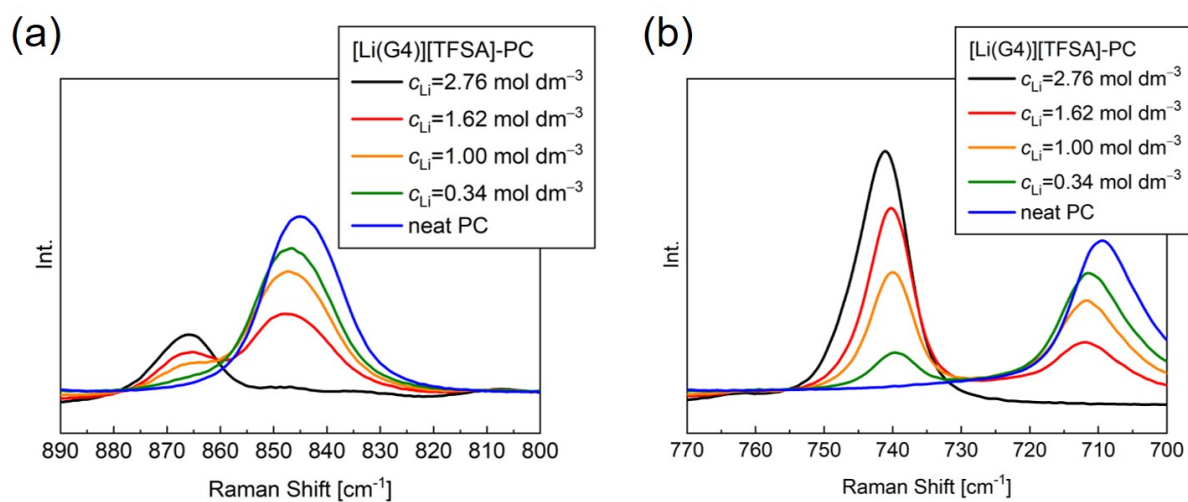

**Figure S2.** Raman spectra in the range of (a) 800-890 cm<sup>-1</sup> and (b) 700-770 cm<sup>-1</sup> for the [Li(G4)][TFSA]-PC.

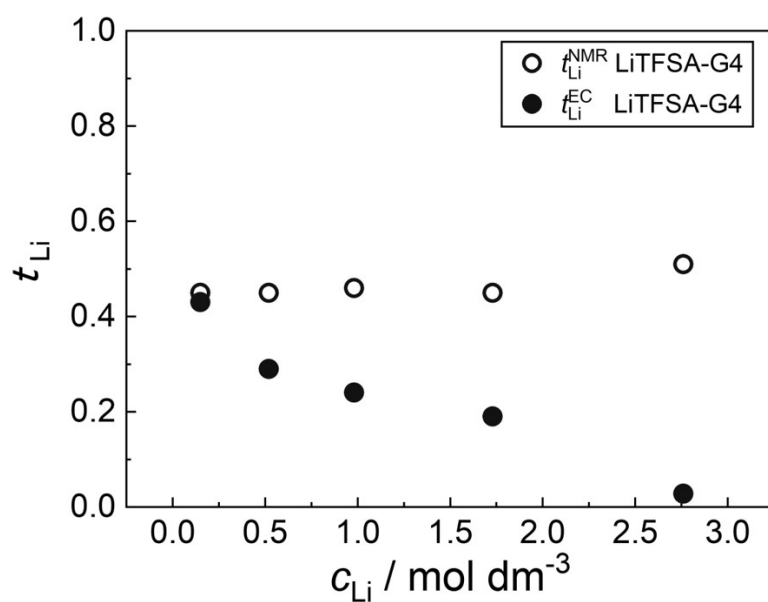

**Figure S3.** Concentration dependence of the Li transference numbers,  $t_{Li}^{EC}$  and  $t_{Li}^{NMR}$ , for the LiTFSA-G4 solutions.

**Table S1.** Salt concentrations and six experimentally obtained parameters for calculating the Onsager transport coefficients.

| Sample                 | $c_{Li}$<br>[mol dm <sup>-3</sup> ] | $\sigma_{ion}$<br>[mS cm <sup>-1</sup> ] | $t_{Li}^{EC}$ | $D$ [10 <sup>-7</sup> cm <sup>2</sup> s <sup>-1</sup> ] |                   |            | $\frac{d\phi}{d\ln(c)}$ |
|------------------------|-------------------------------------|------------------------------------------|---------------|---------------------------------------------------------|-------------------|------------|-------------------------|
|                        |                                     |                                          |               | $D_{Li}$                                                | $D_{anion}$       | $D_{salt}$ |                         |
| [Li(G4)][TFSA]+2HFE    | 1.50                                | 4.0                                      | 0.018         | 8.14                                                    | 8.3               | 2.7        | 2.15                    |
| [Li(G4)][TFSA]+4HFE    | 1.04                                | 5.2                                      | 0.018         | 15.6                                                    | 16.3              | 3.1        | 1.83                    |
| [Li(G4)][TFSA]+15HFE   | 0.38                                | 3.26                                     | 0.012         | 35.9                                                    | 35.9              | 12.6       | 15.9                    |
| [Li(G4)][TFSA]+3PC     | 1.62                                | 5.7                                      | 0.071         | 6.8                                                     | 8.2               | 3.6        | 0.73                    |
| 1M [Li(G4)][TFSA] / PC | 1.00                                | 7.3                                      | 0.12          | 13.0                                                    | 17.1              | 9.0        | 0.57                    |
| [Li(G4)][TFSA]+30PC    | 0.34                                | 4.8 <sup>a</sup>                         | 0.16          | 21.3 <sup>a</sup>                                       | 30.3 <sup>a</sup> | 9.2        | 1.05                    |

<sup>a</sup>Ref 1.

**Table S2.** Five normalized transport coefficients of all the electrolytes at 30 °C.

| Sample                 | $\sigma_{+}^{self}/\sigma_{ion}$ | $\sigma_{-}^{self}/\sigma_{ion}$ | $\sigma_{++}^{distinct}/\sigma_{ion}$ | $\sigma_{--}^{distinct}/\sigma_{ion}$ | $\sigma_{+-}/\sigma_{ion}$ |
|------------------------|----------------------------------|----------------------------------|---------------------------------------|---------------------------------------|----------------------------|
| [Li(G4)][TFSA]         | 0.80 <sup>b</sup>                | 0.77 <sup>b</sup>                | -0.64 <sup>b</sup>                    | -0.45 <sup>b</sup>                    | -0.23 <sup>b</sup>         |
| [Li(G4)][TFSA]+2HFE    | 1.13                             | 1.15                             | -0.55                                 | -1.09                                 | -0.18                      |
| [Li(G4)][TFSA]+4HFE    | 1.15                             | 1.20                             | -0.48                                 | -1.17                                 | -0.15                      |
| [Li(G4)][TFSA]+15HFE   | 1.55                             | 1.54                             | -0.69                                 | -1.54                                 | -0.07                      |
| [Li(G4)][TFSA]+3PC     | 0.72                             | 0.86                             | -0.042                                | -0.84                                 | -0.14                      |
| 1M [Li(G4)][TFSA] / PC | 0.65                             | 0.86                             | 0.069                                 | -0.83                                 | -0.12                      |
| [Li(G4)][TFSA]+30PC    | 0.56                             | 0.79                             | 0.38                                  | -0.79                                 | -0.030                     |

<sup>b</sup>Ref 2.**References:**

1. K. Ueno, J. Murai, K. Ikeda, S. Tsuzuki, M. Tsuchiya, R. Tatara, T. Mandai, Y. Umebayashi, K. Dokko and M. Watanabe, *J. Phys. Chem. C*, 2016, **120**, 15792-15802.
2. K. Shigenobu, K. Dokko, M. Watanabe and K. Ueno, *Phys. Chem. Chem. Phys.*, 2020, **22**, 15214–15221.
